# Supplementary material
Source: Springer Nature journal article supplement (https://www.springermedizin.de/resource/supplementary/12879_2012_2270_MOESM1_ESM.pdf/9445160)

**A**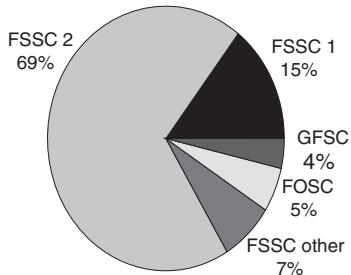**Hematology Patient Isolates (n= 55)****B**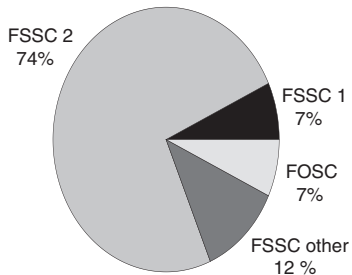**Dermatology Patient Isolates (n= 43)****C**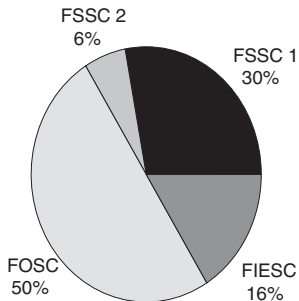**Environmental Isolates (n= 68)**

Supplement: MOESM1 [file 9445160]
